# Supplementary material for: Saliva SARS-CoV-2 Antibody Prevalence in Children
Source: PubMed Central journal article supplement (PMC8557814; doi:10.1128/spectrum.00731-21), 2021-09-15

## Supplementary Material Legends

### **Supplementary table 1. Mean, standard deviation, assay cut-off, replicability and precision of Luminex assays**

Mean, standard deviation (SD) and assay cut-off (mean + 2x SD) are calculated and presented as log<sub>10</sub> values. R<sup>2</sup> presents the data replicability and is calculated by simple linear regression on the data in this study plotted against a replicate measurement of data using the same assay conditions on a different day, using positive control sera (n=6) or saliva (n = 5) included on each plate. CV = coefficient of variation, the CV was calculated for each positive control sample and the range is shown.

### **Supplementary table 2. Study population characteristics and seroprevalence**

Characteristics are described for all children included in at least one of the assays (n = 517). Prevalence was calculated as number (percentage) from non-missing values for either the Wantai RBD total antibody assay (n=487, 30 missing) or the independent variable. Abbreviations: COVID-19 = coronavirus disease 2019, ER = emergency room, No = number, PCR = polymerase chain reaction assay, RBD = Receptor binding domain, SARS-CoV-2 = severe acute respiratory syndrome coronavirus 2.

### **Supplementary figure 1. Participant recruitment and inclusion**

The inclusion process is depicted for the total study sample (n=517). Differences in number of serum samples analyzed between the Luminex and the Wantai RBD total antibody assays are due to the serum volumes required for the Luminex (2,5 µl per sample) and the Wantai (200 µl per sample). Differences between total study sample and number of saliva samples are due to insufficient sampling.

### **Supplementary figure 2. IgG and IgA Titers in the Luminex assay**

SARS-CoV-2 S, RBD and N protein specific IgG and IgA were measured in all serum (n=509) and saliva (n=430) samples with the Luminex assay, expressed in MFI. The cut-off for a positive result was determined using the geometric mean + 2x the geometric standard deviation, for each

combination of sample type, antibody isotype and antigen separately (see supplementary table 1). All dots represent individual data points, the black line is the geometric mean and the dotted line the cut-off. Abbreviations: S = trimeric SARS-CoV-2 spike protein, RBD = the monomeric receptor binding domain of the SARS-CoV-2 spike protein, N = SARS-CoV-2 nucleocapsid protein, MFI = median fluorescence intensity.

### **Supplementary figure 3. Serum and saliva antibody prevalence over time**

SARS-CoV-2 S, RBD and N-specific IgG and IgA were measured in serum (n=487) and saliva (n=413) samples with the Luminex assay, expressed as MFI. Only samples also measured in the Wantai assay are shown with the positive Wantai results indicated in blue. The cut-off for a positive result in the Luminex was determined using the geometric mean + 2x the geometric standard deviation, for each combination of sample type, antibody isotype and antigen separately (see supplementary table 1). All dots represent individual data points, and the red dotted line is the assay cut-off. Data is plotted against the days since first inclusion. Abbreviations: S = trimeric SARS-CoV-2 spike protein, RBD = the monomeric receptor binding domain of the SARS-CoV-2 spike, N = SARS-CoV-2 nucleocapsid protein, MFI = median fluorescence intensity.

## Supplementary tables

**Supplementary table 1. Mean, standard deviation, assay cut-off, replicability and precision of Luminex assays**

|                | Serum IgG |      |      | Serum IgA |      |      | Saliva IgG |      |      | Saliva IgA |      |      |
|----------------|-----------|------|------|-----------|------|------|------------|------|------|------------|------|------|
|                | S         | RBD  | N    | S         | RBD  | N    | S          | RBD  | N    | S          | RBD  | N    |
| Mean           | 0.30      | 0.59 | 0.99 | 0.54      | 1.52 | 0.93 | 0.90       | 0.82 | 0.75 | 2.40       | 2.60 | 2.75 |
| SD             | 0.49      | 0.58 | 0.59 | 0.59      | 0.71 | 0.81 | 0.62       | 0.61 | 0.58 | 0.71       | 0.97 | 1.03 |
| Cut-off        | 1.27      | 1.74 | 2.16 | 1.71      | 2.93 | 2.54 | 2.15       | 2.04 | 1.91 | 3.81       | 4.54 | 4.80 |
| R <sup>2</sup> | 0.89      | 0.89 | 0.90 | 0.94      | 0.79 | 0.67 | 0.68       | 0.69 | 0.73 | 0.94       | 0.83 | 0.91 |
| CV             | 1-4%      | 1-4% | 1-4% | 2-5%      | 2-5% | 1-5% | 2-8%       | 4-7% | 4-9% | 2-3%       | 2-5% | 3-5% |

**Supplementary table 2 Study population characteristics and seroprevalence**

|                                    | <b>Total sample<br/>(percentage)</b> | <b>Seronegative<br/>Wantai No<br/>(percentage)</b> | <b>Seropositive<br/>Wantai No<br/>(percentage)</b> |
|------------------------------------|--------------------------------------|----------------------------------------------------|----------------------------------------------------|
| <b>Total sample</b>                | 517 (100%)                           | 471 (96.7%)                                        | 16 (3.3%)                                          |
| <b>Sex</b>                         |                                      |                                                    |                                                    |
| Female                             | 265 (51.3%)                          | 242 (96.0%)                                        | 10 (4.0%)                                          |
| Male                               | 252 (48.7%)                          | 229 (97.4%)                                        | 6 (2.6%)                                           |
| <b>Age (years)</b>                 |                                      |                                                    |                                                    |
| < 1                                | 47 (9.1%)                            | 34 (100.0%)                                        | 0 (0.0%)                                           |
| 1-4                                | 71 (13.7%)                           | 63 (98.4%)                                         | 1 (1.6%)                                           |
| 5-9                                | 107 (20.7%)                          | 99 (97.1%)                                         | 3 (2.9%)                                           |
| 10-14                              | 146 (28.2%)                          | 139 (95.9%)                                        | 6 (4.1%)                                           |
| 15-17                              | 146 (28.2%)                          | 136 (95.8%)                                        | 6 (4.2%)                                           |
| <b>Inclusion</b>                   |                                      |                                                    |                                                    |
| April/May                          | 86 (16.6%)                           | 75 (94.9%)                                         | 4 (5.1%)                                           |
| May/June                           | 109 (21.1%)                          | 100 (97.1%)                                        | 3 (2.9%)                                           |
| June/July                          | 69 (13.3%)                           | 64 (95.5%)                                         | 3 (4.5%)                                           |
| July/August                        | 95 (18.4%)                           | 88 (97.8%)                                         | 2 (2.2%)                                           |
| August/September                   | 107 (20.7%)                          | 97 (96.0%)                                         | 4 (4.0%)                                           |
| September/October                  | 51 (9.9%)                            | 47 (100.0%)                                        | 0 (0.0%)                                           |
| <b>Immunocompromised state</b>     | 185 (35.8%)                          | 176 (96.7%)                                        | 6 (3.3%)                                           |
| - Immunodeficiency                 | 2.9%                                 |                                                    |                                                    |
| - Autoimmune disease               | 30.8%                                |                                                    |                                                    |
| - Hematological malignancies       | 0.8%                                 |                                                    |                                                    |
| - Use of immunomodulating drugs    | 34.7%                                |                                                    |                                                    |
| <b>Underlying illness</b>          | 128 (24.8%)                          | 114 (95.0%)                                        | 6 (5.0%)                                           |
| - Obesity                          | 2.9%                                 |                                                    |                                                    |
| - Respiratory                      | 4.8%                                 |                                                    |                                                    |
| - Cardiovascular                   | 6.2%                                 |                                                    |                                                    |
| - Diabetic                         | 0.4%                                 |                                                    |                                                    |
| - Other malignancies               | 1.9%                                 |                                                    |                                                    |
| - Endocrine/metabolic              | 5.4%                                 |                                                    |                                                    |
| - Kidney disease                   | 2.3%                                 |                                                    |                                                    |
| - Hematologic                      | 2.1%                                 |                                                    |                                                    |
| - Psychomotor retardation          | 0.8%                                 |                                                    |                                                    |
| <b>No relevant medical history</b> | 201 (38.9%)                          | 180 (97.8%)                                        | 4 (2.2%)                                           |
| Unknown                            | 3 (0.6%)                             | 3 (100.0%)                                         | 0 (0.0%)                                           |
| <b>Type of hospital visit</b>      |                                      |                                                    |                                                    |
| - Day-care                         | 271 (52.4%)                          | 244 (94.9%)                                        | 13 (5.1%)                                          |
| - Outpatient                       | 103 (19.9%)                          | 100 (99.0%)                                        | 1 (1.0%)                                           |
| - ER visit                         | 27 (5.2%)                            | 27 (100.0%)                                        | 0 (0%)                                             |
| - Inpatient                        | 110 (21.3%)                          | 94 (97.9%)                                         | 2 (2.1%)                                           |
| - Unknown                          | 6 (1.2%)                             | 36 (100.0%)                                        | 0 (0%)                                             |

|                                               |              |             |           |
|-----------------------------------------------|--------------|-------------|-----------|
| <b>Type of hospital</b>                       |              |             |           |
| - Tertiary care center                        | 363 (70.2%)  | 327 (95.3%) | 16 (4.7%) |
| - Secondary care center                       | 154 (29.8%)  | 144 (100%)  | 0 (0%)    |
| <b>COVID-19 symptoms at time of inclusion</b> |              |             |           |
| - Yes                                         | 138 (26.7%)  | 130 (98.5%) | 2 (1.5%)  |
| - No                                          | 377 (73.0%)  | 339 (96.0%) | 14 (4.0%) |
| <b>COVID-19 symptoms in last 4 weeks</b>      |              |             |           |
| - Yes                                         | 232 (44.9%)  | 210 (94.6%) | 12 (5.4%) |
| - No                                          | 280 (54.2%)  | 257 (98.5%) | 4 (1.5%)  |
| <b>COVID-19 in household</b>                  |              |             |           |
| - Yes                                         | 10 (1.9%)    | 5 (50.0%)   | 5 (50.0%) |
| - No                                          | 497 (96.1%)  | 456 (97.6%) | 11 (2.4%) |
| <b>Previous SARS-CoV-2 PCR Positive</b>       | 3/107 (2.8%) | 1 (33.3%)   | 2 (66.7%) |

# Figures

Supplementary figure 1. Participant recruitment and inclusion

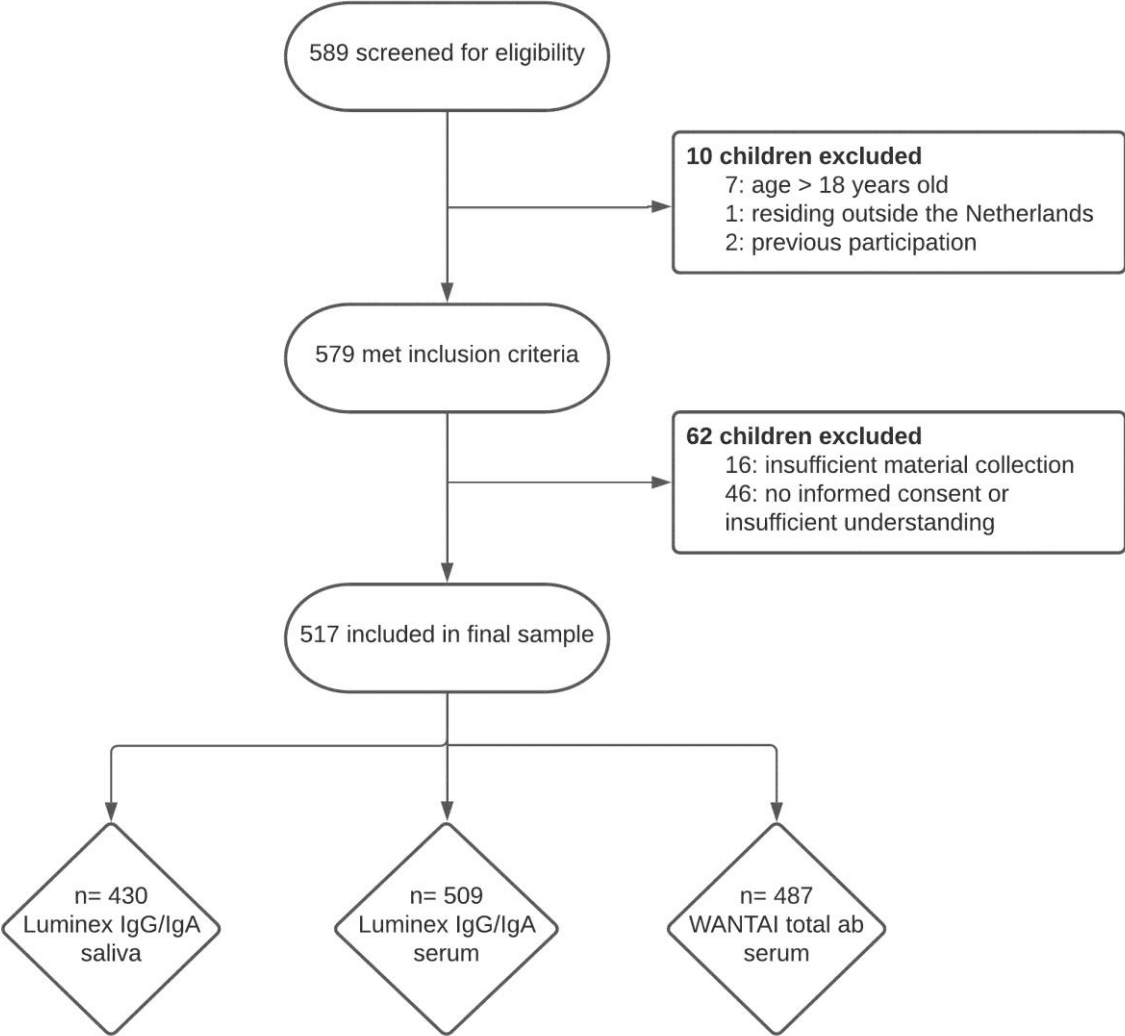

Supplementary figure 2. IgG and IgA Titers in the Luminex assay

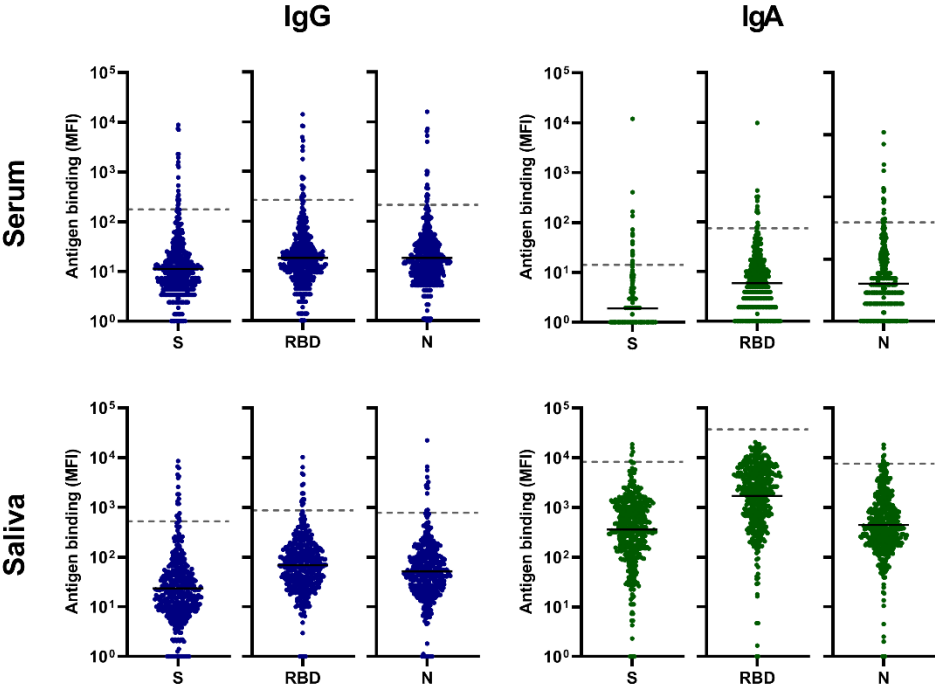

Supplementary figure 3. Serum and saliva antibody prevalence over time

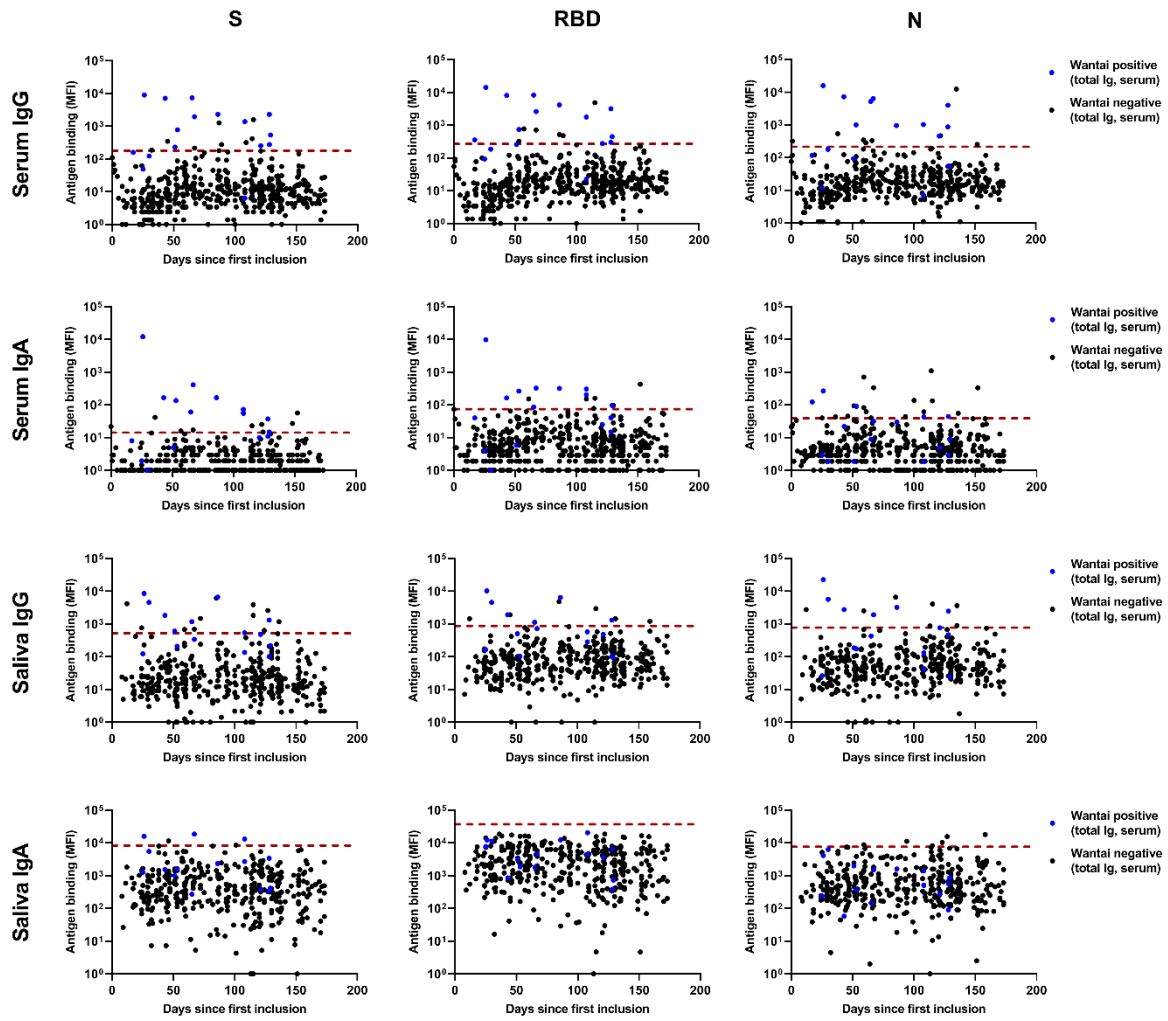

Supplement: spectrum00731-21_supp_1_seq9.pdf [file spectrum00731-21_supp_1_seq9.pdf]
